# Supplementary material
Source: HighWire-hosted journal article supplement (https://bjgp.org/highwire/filestream/27648/field_highwire_adjunct_files/0/bjpg57-866BoxS1.pdf)
Supplement: bjpg57-866BoxS1.pdf [file bjpg57-866BoxS1.pdf]

**Supplementary Box 1. Guide to transcription conventions.**

|                       |                                                   |
|-----------------------|---------------------------------------------------|
| 'hhh                  | Audible inhalation                                |
| hhh                   | Audible exhalation                                |
| :                     | Extended sound                                    |
| ↑                     | Rising intonation                                 |
| ↓                     | Falling intonation                                |
| ?                     | Rising inflection                                 |
| _____                 | Emphasis (word or part of word underlined)        |
| ° °                   | Talk is quieter than the surrounding talk         |
| < >                   | Talk is faster than the surrounding talk          |
| UPPERCASE             | Talk is louder than the surrounding talk          |
| =                     | Latched utterance, no interval between utterances |
| [ ]                   | Beginning and end of overlapping talk             |
| (.)                   | A pause of less than 0.2 seconds                  |
| (0.0)                 | Silence measured in seconds and 10ths of seconds  |
| <i>Italic writing</i> | Non-verbal actions                                |
| (( ))                 | Transcriber's notes                               |
